# Supplementary material
Source: PubMed Central journal article supplement (PMC3258610)
Supplement: 1114966108_pnas.201114966SI.pdf [file 1114966108_pnas.201114966SI.pdf]

# Supporting Information

Reeves et al. 10.1073/pnas.1114966108

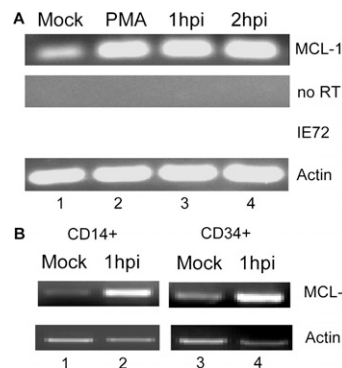

**Fig. S1.** HCMV up-regulates MCL-1 mRNA expression in myeloid cells. (*A* and *B*) RT-PCR analysis for MCL-1, IE72, and actin expression was performed on RNA isolated from mock (bar 1), PMA-treated (bar 2), or HCMV-infected (bars 3 and 4) THP1 cells (*A*) and primary CD14<sup>+</sup>/CD34<sup>+</sup> cells (*B*).

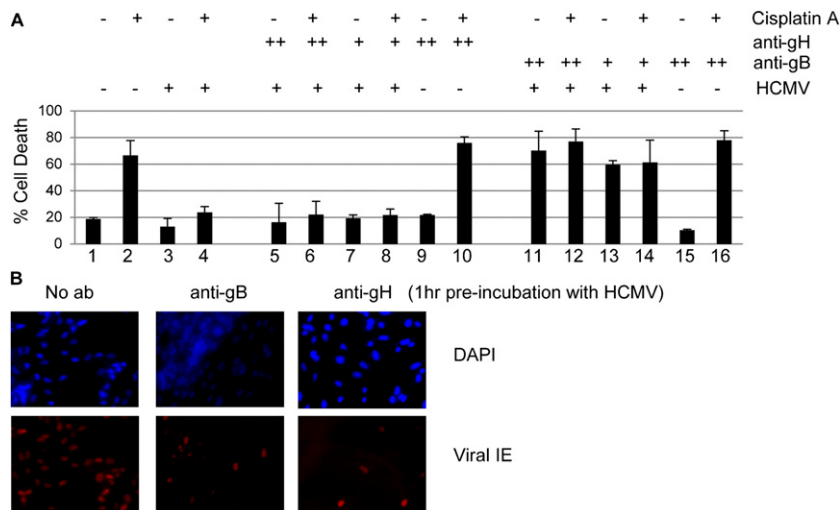

**Fig. S2.** HCMV-mediated protection of THP1 cells from cisplatin A-induced cell death is gB-dependent. (*A*) HCMV preincubated with anti-gB (bars 11–14) or anti-gH (bars 5–8) antibody was used to infect THP1 cells which, 2 h post infection (hpi), were incubated with 0.1% DMSO (bars 5, 7, 11, and 13) or cisplatin A (bars 6, 8, 12, and 14) for 3 h, then rescued in fresh media. As controls, the anti-gB (bars 15 and 16) and anti-gH (bars 9 and 10) were incubated directly with cells in the absence of HCMV infection. Cell viability was then measured by trypan blue staining at 24 hpi. (*B*) HCMV preincubated with no antibody, anti-gB (1 µg/mL) or anti-gH (10 µg/mL) blocking antibodies for 1 h was used to infect fibroblasts. At 24 hpi, cells were stained for viral IE gene expression and counterstained with DAPI to evaluate infectivity.

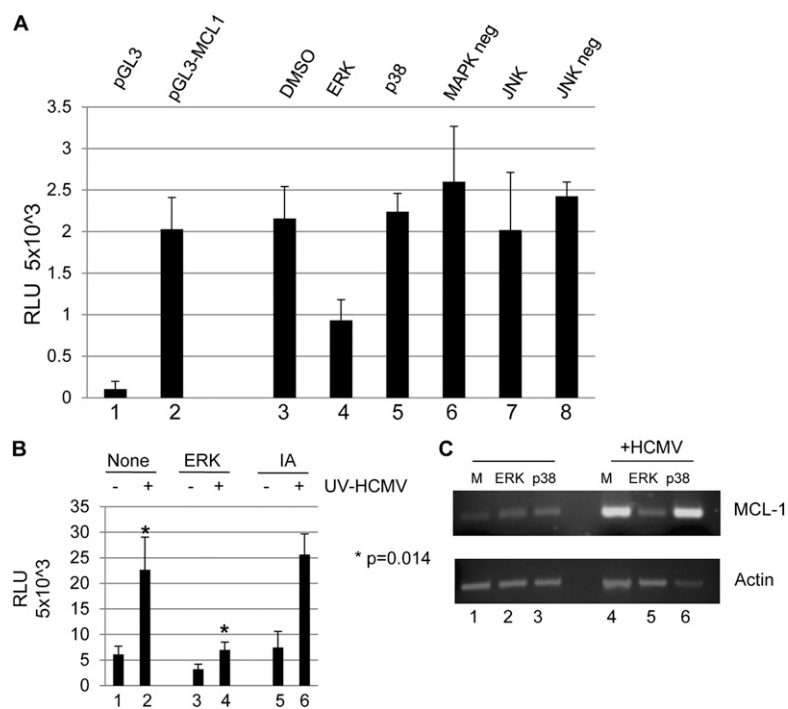

**Fig. S3.** HCMV-induced activation of the MCL-1 promoter in THP1 cells is ERK–MAPK-dependent. (A) A pGL3 plasmid encoding luciferase under the control of the MCL-1 promoter (pGL3-MCL1) was transfected into THP1 cells (bars 2–8) and, 24 h after transfection, incubated with 0.1% DMSO (bar 3), 10  $\mu$ M PD98059 (bar 4), 25  $\mu$ M SB203580 (bar 5), 25  $\mu$ M SB202474 (bar 6), 10  $\mu$ M SPB600125 (bar 7), or JNK negative control (bar 8), and assayed for luciferase expression 8 h later. (B) THP1 cells transfected with pGL3-MCL1 were pretreated with DMSO, ERK inhibitor, or inactive analogue and then infected with UV-inactivated HCMV, and luciferase measured 16 h later. (C) RT-PCR for MCL-1 and actin gene expression was performed on DNase-treated total RNA isolated 1 hpi from mock- (bars 1–3) or HCMV (bars 4–6)-infected cells pretreated with 0.1% DMSO (bars 1 and 4), ERK inhibitor PD98059 (bars 2 and 5), or p38 inhibitor SB203580 (bars 3 and 6) for 1 h.
